# Supplementary material
Source: PubMed Central journal article supplement (PMC4085627)
Supplement: mmc1.pdf [file mmc1.pdf]

The American Journal of Human Genetics, Volume 95

Supplemental Data

## **Integrative DNA, RNA, and Protein Evidence**

### **Connects *TREML4* to Coronary Artery Calcification**

Shurjo K. Sen, Kimberly C. Boelte, Jennifer J. Barb, Roby Joehanes, XiaoQing Zhao, Qi Cheng, Lila Adams, Jamie K. Teer, David S. Accame, Soma Chowdhury, Larry N. Singh, NISC Comparative Sequencing Program, CHARGE Consortium, Maryam Kavousi, Patricia A. Peyser, Laura Quigley, Debra Long Priel, Karen Lau, Douglas B. Kuhns, Teizo Yoshimura, Andrew D. Johnson, Shih-Jen Hwang, Marcus Y. Chen, Andrew E. Arai, Eric D. Green, James C. Mullikin, Frank D. Kolodgie, Christopher J. O'Donnell, Renu Virmani, Peter J. Munson, Daniel W. McVicar, and Leslie G. Biesecker

## Supplemental Figures

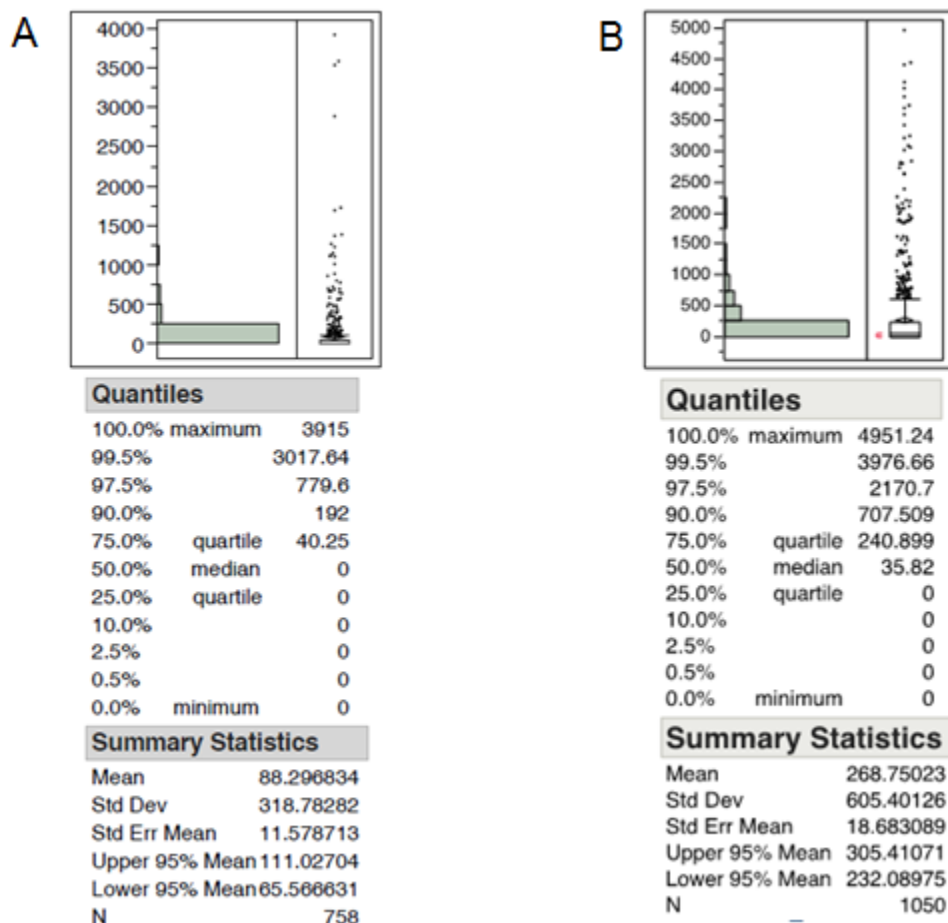

Figure S1: Distribution of CAC scores in (A) ClinSeq<sup>®</sup> and (B) the Framingham Heart Study

## Appendix S1

### Calculation of CAC relative risk conferred by the *rs2803496* C allele

For relative risk calculations, for each CAC score threshold  $x$ , we the following four values were tabulated:

- The number of individuals with  $CAC \geq x$  and having the C allele (i.e. CC or CT, the non-TT genotypes)
- The number of individuals with  $CAC = 0$  and having the C allele (i.e. CC or CT, the non-TT genotypes)
- The number of individuals with  $CAC \geq x$  and without the C allele (i.e. with the TT genotype).
- The number of individuals with  $CAC = 0$  and without the C allele (i.e. with the TT genotype).

These values are provided in Supplemental Table 7. Note that  $b$  and  $d$  are constant across all values of  $x$ .

E.g., at a CAC threshold of 400, the 2x2 table would look like this:

|        | CAC $\geq$ x | CAC=0 |
|--------|--------------|-------|
| Non TT | $a$          | $b$   |
| TT     | $c$          | $d$   |

And from our data:

|        | CAC $\geq$ 400 | CAC=0 |
|--------|----------------|-------|
| Non TT | 18             | 87    |
| TT     | 30             | 345   |

The relative risk (RR) of having CAC $\geq$ 400 in the non-TT group (versus the TT group) was then calculated using the standard formula:

$$RR = (a/(a+b))/(c/(c+d))$$

$$\text{Hence, at CAC}\geq 400, RR = (18/(18+87)) / (30/(30+345)) = .1714 / .08 = 2.14$$

95% confidence intervals for the RR value at each CAC threshold were derived in the following manner:

1. First, we derived the natural log of the RR:  $\ln(RR)$
2. The sampling distribution of the RR is approximately normally distributed on the natural log scale.
3. The confidence coefficient is 1.96 for a 95% confidence interval from the standard normal distribution.
4. The standard error (SE) of  $\ln(RR)$  is  $\text{Sqrt}(b/(a(a+b))+d/(c(c+d)))$
5. Combining points 3 and 4 above, the upper and lower 95% confidence interval limits (UCL and LCL, respectively) on the natural log scale are:  $\ln(RR) \pm 1.96 * SE \ln(RR)$
6. Next, we used the exponential function to find the upper and lower 95% confidence limits back to the original scale (e.g., at CAC=400, 95% UCL = 3.69 and LCL = 1.24, respectively)
7. If the 95% confidence interval does not contain the value 1 then the association is statistically significant at alpha of 0.05.

To generate Figure 2, the RR values were plotted as an X-Y scatter plot including the lower 95% confidence interval at each threshold.
